# Supplementary material for: NKp30 expression is a prognostic immune biomarker for stratification of patients with intermediate-risk acute myeloid leukemia
Source: PubMed Central journal article supplement (PMC5564787; doi:10.18632/oncotarget.17747), 2017-05-10
Supplement: oncotarget-08-49548-s001.pdf [file oncotarget-08-49548-s001.pdf]

## NKp30 expression is a prognostic immune biomarker for stratification of patients with intermediate-risk acute myeloid leukemia

### Supplementary Materials

**Supplementary Table 1: Immunostaining of NK cells**

|              | IPC cohort | GOELAMS cohort     | Clone  | Company                  |
|--------------|------------|--------------------|--------|--------------------------|
| CD45         | APC        | KO                 | J.33   | Beckman-Coulter          |
| CD3          | FITC       | ECD                | UCHT1  | Beckman-Coulter          |
| CD56         | PC7        | APC                | NKH-1  | Beckman-Coulter          |
| NKp30        | PE         | PE                 | Z25    | Beckman-Coulter          |
| CD158a,h     | -          | PC7                | EB6B   | Beckman-Coulter          |
| CD158b1/b2/j | -          | PC7                | GL183  | Beckman-Coulter          |
| CD57         | -          | Pacific Blue       | NC1    | Beckman-Coulter          |
| NKG2A        | -          | APC                | Z199.1 | Beckman-Coulter          |
| Vivid        | -          | LIVE/DEAD® Near IR | -      | Thermo Fisher Scientific |
| IgG Isotype  | PE         | PE                 | -      | Beckman-Coulter          |

Abbreviations: APC: allophycocyanin; ECD: Phycoerythrin-Texas Red-x™\*; FITC: fluorescein isothiocyanate; IR: infra-red; KO: Krome Orange™\*; PC5: Phycoerythrin-Cyanine 5; PC7: Phycoerythrin-Cyanine 7 ; PE : Phycoerythrin.

\* Krome Orange and Phycoerythrin-Texas Red-x are registered trademark of Beckman Coulter, Inc., in the United States and other countries

**Supplementary Table 2: Immunostaining of leukemic blasts**

| <b>Antigen</b> | <b>Fluorochrome</b> | <b>Clone</b> | <b>Company</b>            |
|----------------|---------------------|--------------|---------------------------|
| CD45           | KO                  | J.33         | Beckman-Coulter           |
| CD33           | PC7                 | D3HL60.251   | Beckman-Coulter           |
| CD34           | PC7                 | 581          | Beckman-Coulter           |
| CD13           | PC7                 | Immu103.44   | Beckman-Coulter           |
| CD15           | PC7                 | HI98         | BD Biosciences            |
| CD14           | APC H7              | MφP9         | BD Biosciences            |
| Live/Dead®     | Near IR             | -            | Thermo Fisher Scientific  |
| B7H6           | Purified (goat)     | 5.51.18      | Kind gift of Pr. Cerwenka |
| Anti-goat      | PE                  | # IM0855     | Beckman-Coulter           |

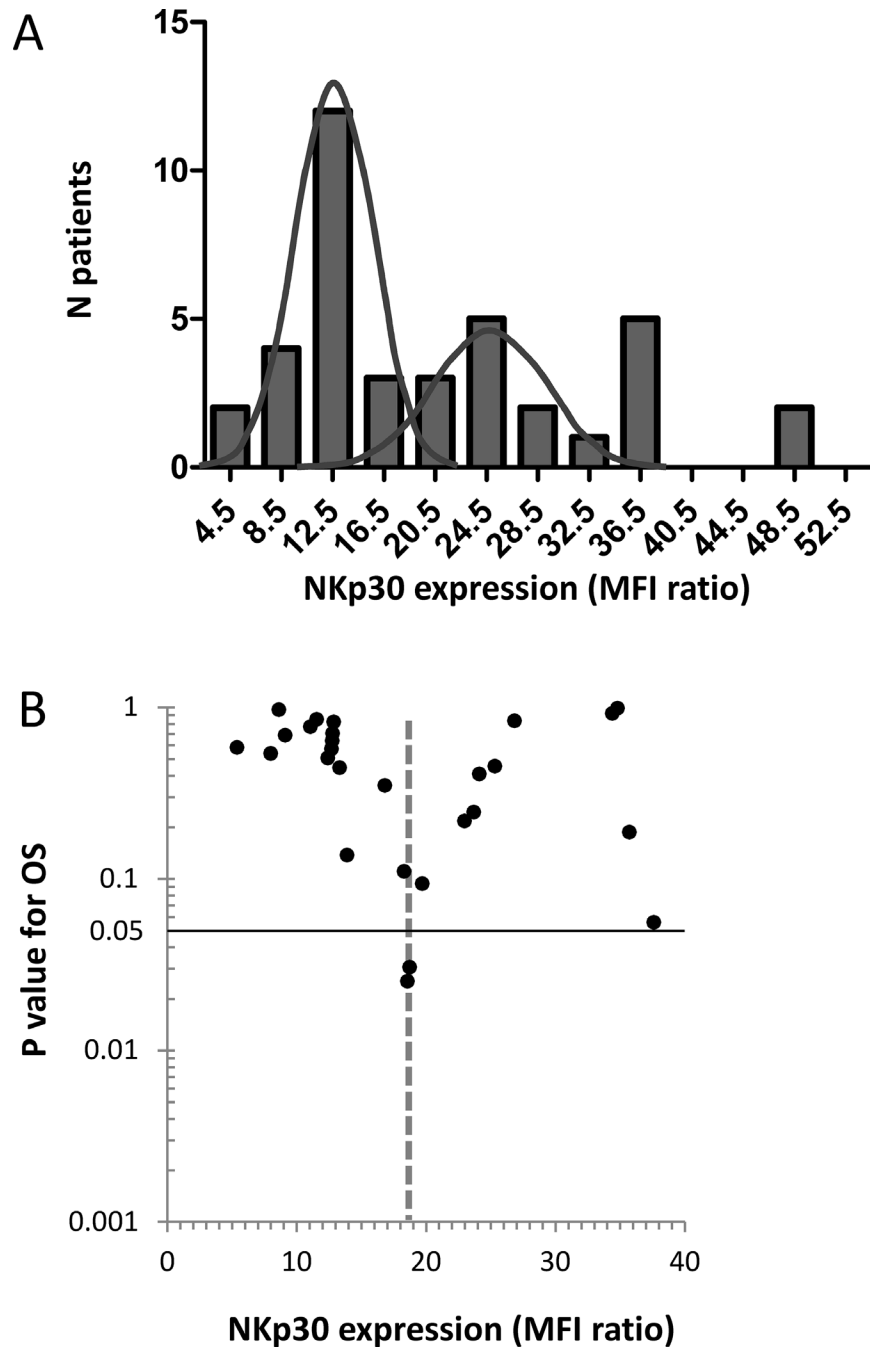

**Supplementary Figure 1: Threshold determination for NKp30 expression on NK cells after complete remission (IPC prospective cohort).** Distribution histograms of NKp30 mean fluorescence intensity (MFI) ratio (NKp30 MFI / isotype control MFI) in patients with AML at complete remission. The curves are estimates of population density distribution. The dashed line represents the threshold used in the rest of the study. The black line represents the limit of statistical significance ( $P < 0.05$ ). The normality of distributions were evaluated with a d'Agostino-Pearson normality test.

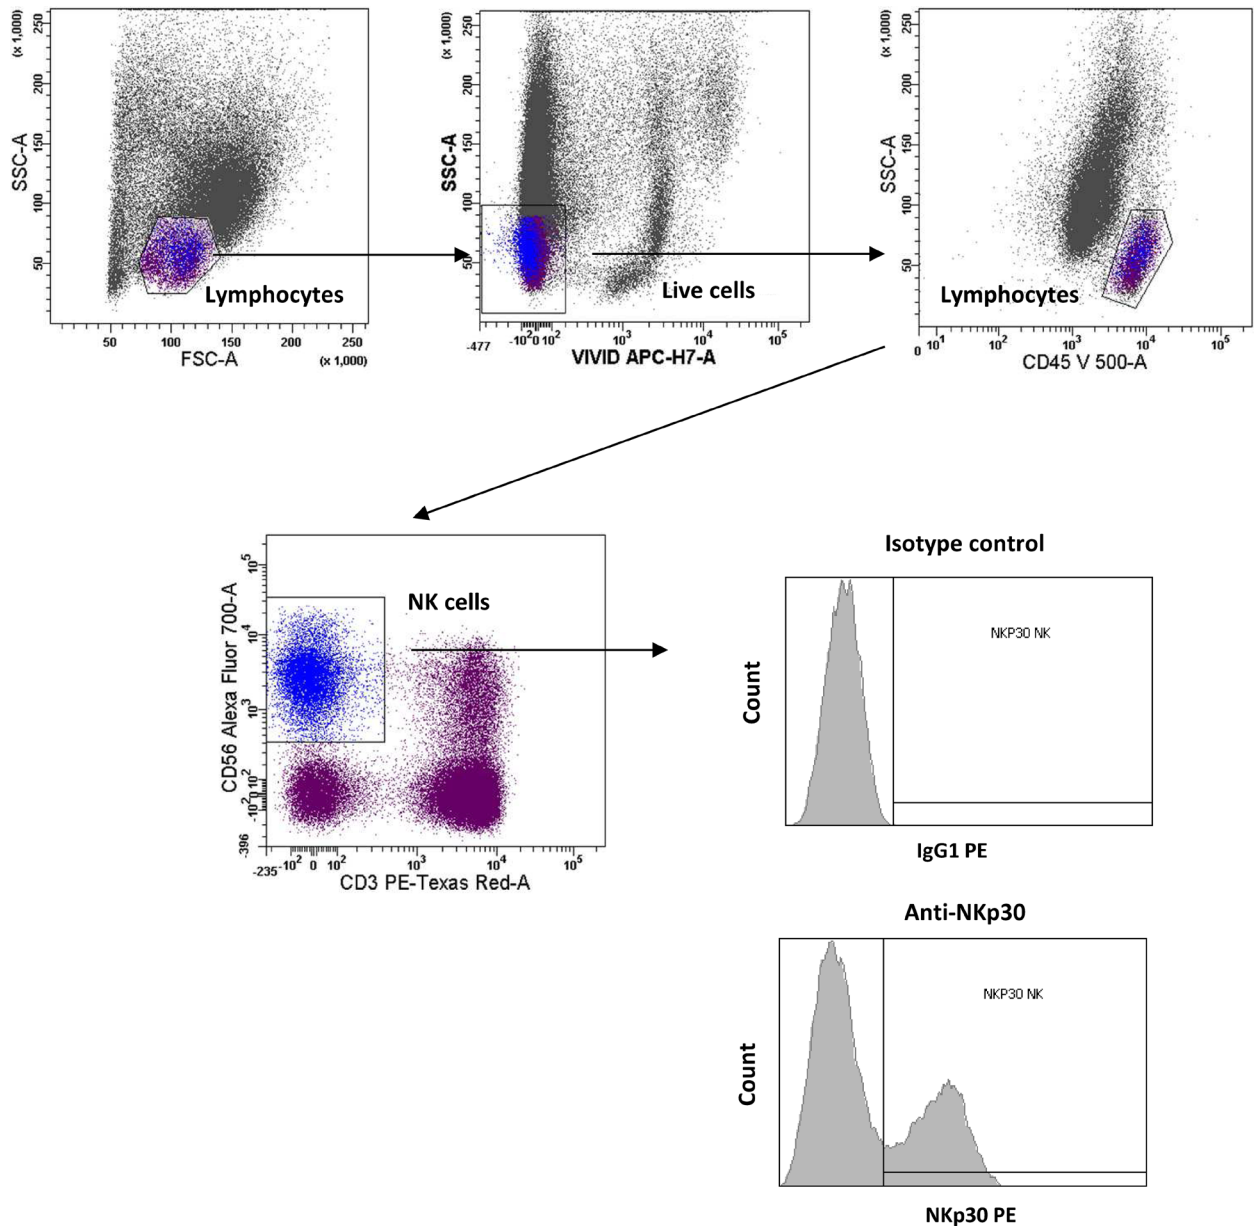

Supplementary Figure 2: Example of gating strategy for NK cells identification and NKp30 MFI ratio determination from of an AML patient at diagnosis.

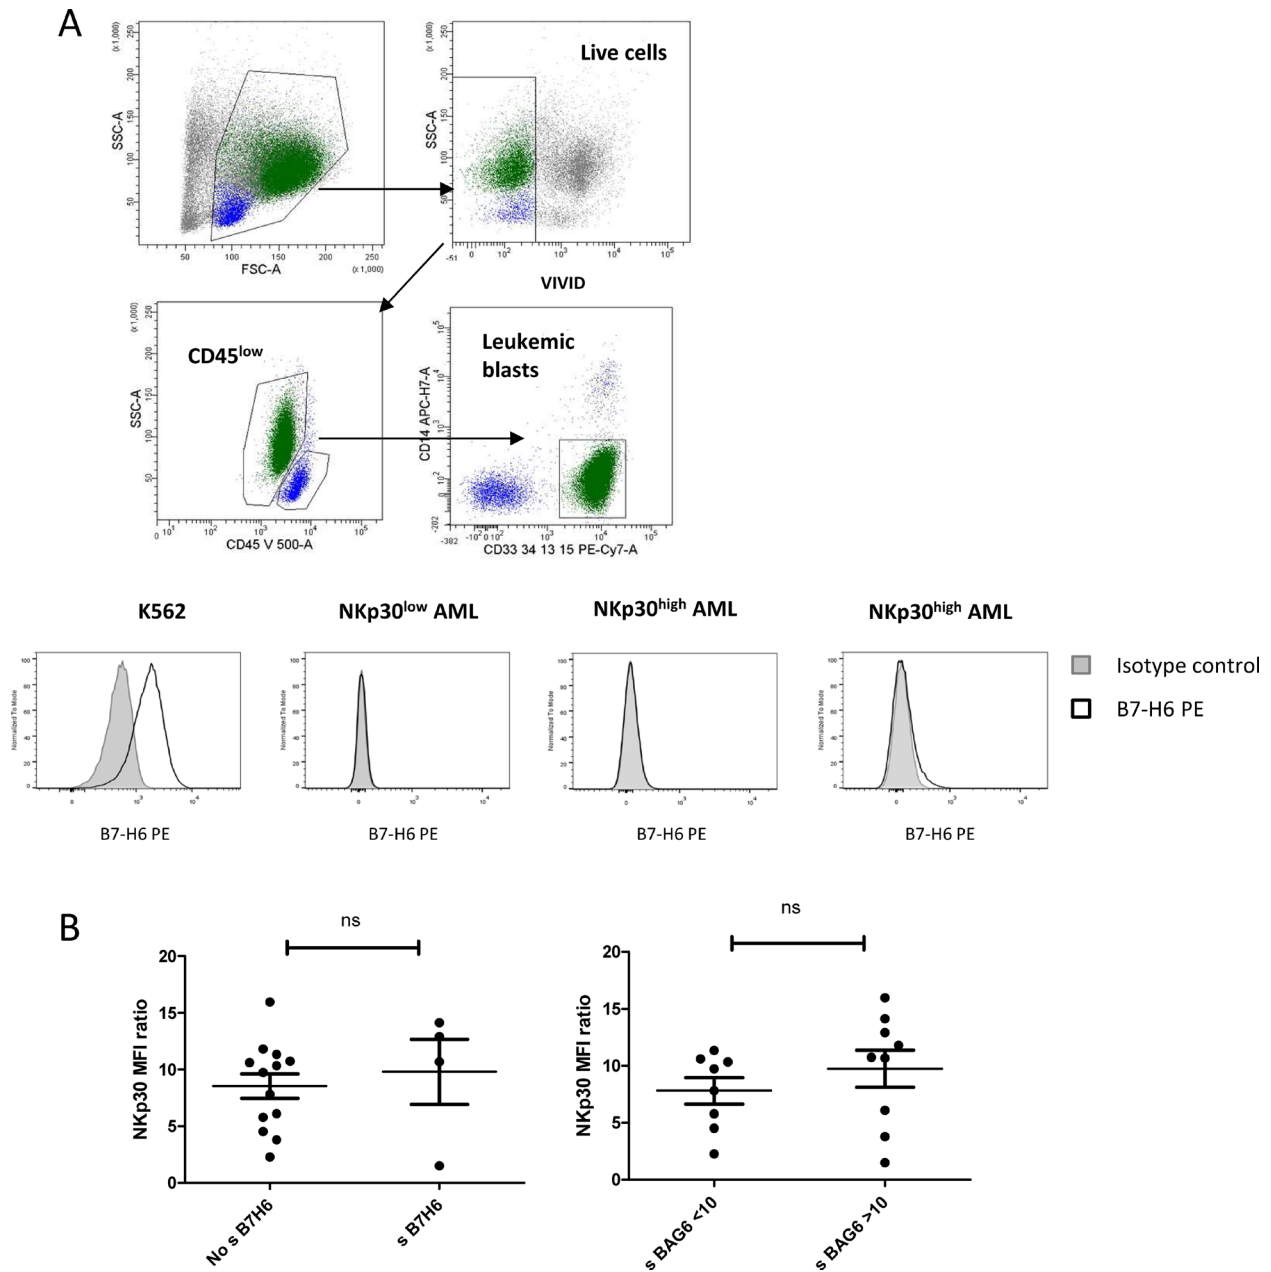

**Supplementary Figure 3: NKp30 ligands.** (A) NKp30 expression according to B7-H6 expression on leukemic blasts: B7-H6 expression was detected on CD45<sup>low</sup> CD13<sup>+</sup> and/or CD33<sup>+</sup> and/or CD34<sup>+</sup> cells by flow cytometry ( $N = 39$  patients, GOELAMS cohort). NKp30 expression is represented in patients with no detectable B7-H6 expression, and in patients with at least 0.1% B7-H6<sup>+</sup> leukemic blasts. K562 cell line was used as a positive control. (B) NKp30 expression according to plasmatic NKp30 soluble ligands: soluble B7-H6 (sB7-H6) and soluble BAG6 (sBAG6) was detected in the plasma from 17 AML patients at diagnosis by ELISA. NKp30 expression was analyzed by flow cytometry on NK cells in patients with and without detectable soluble ligands. Statistical analyses were performed using a Mann-Whitney test.  $P < 0.05$  was considered significant. ns: non-significant.
